# Supplementary material for: Photochromism-promoted highly efficient photocatalytic degradation in ferroelectric photochromics
Source: Royal Society of Chemistry journal article supplement (doi:10.1039/d2qi02632e), 2023-01-01
Supplement: d2qi02632e1.pdf [file d2qi02632e1.pdf]

## Supporting Information

# Photochromism-promoted high efficient photocatalytic degradation in ferroelectric photochromics

Lizhen Lu,<sup>1,3</sup> Zhen Zhang,<sup>1</sup> Peng Li,<sup>1</sup> Haiqin Sun,<sup>2,1</sup> Qiwei Zhang,<sup>2,1\*</sup> and Xihong Hao<sup>1</sup>

<sup>1</sup> Inner Mongolia Key Laboratory of Ferroelectric-related New Energy Materials and Devices, School of Materials and Metallurgy, Inner Mongolia University of Science and Technology, 7# Arerding Street, Kun District, Baotou 014010, China.

<sup>2</sup> College of Physics and Technology, Guangxi Normal University, Guilin 541004, China

<sup>3</sup> School of Materials Science and Engineering, Southwest Jiaotong University, Chengdu 610031, P. R. China

\*qwzhang2021@163.com

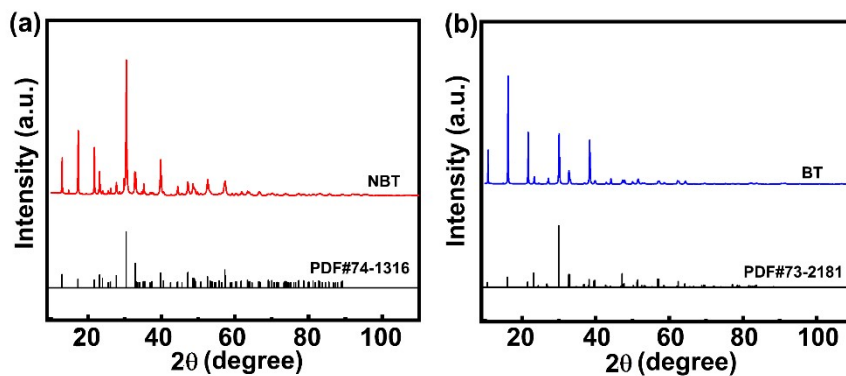

Fig. S1. XRD patterns of (a) NBT and (b) BT, respectively.

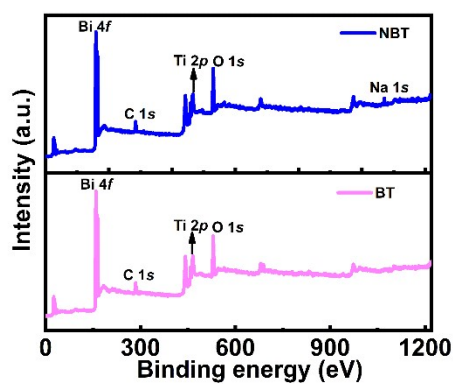

Fig S2. XPS spectra of (a) NBT and (b) BT samples, respectively.

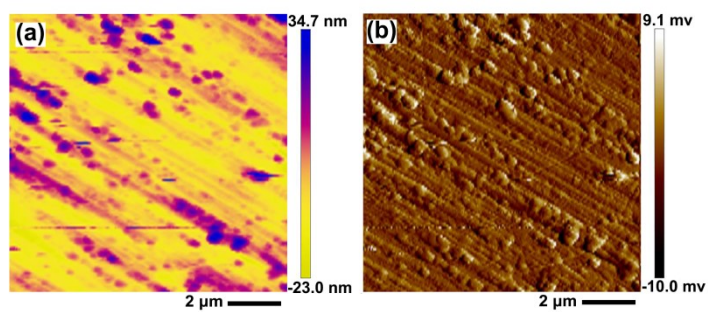

Fig. S3. (a) and (b) AFM image and amplitude of NBT surface before light irradiation, respectively.

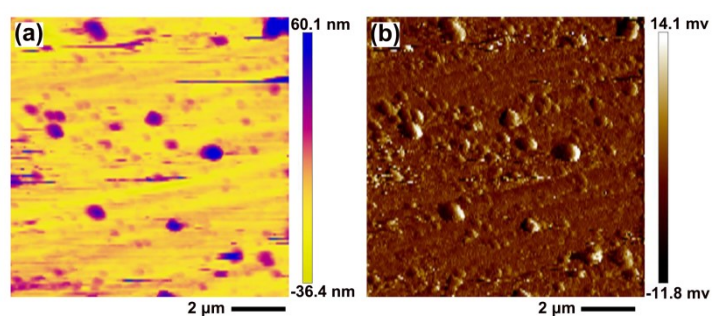

Fig. S4. (a) and (b) AFM image and amplitude of BT surface before light irradiation, respectively.

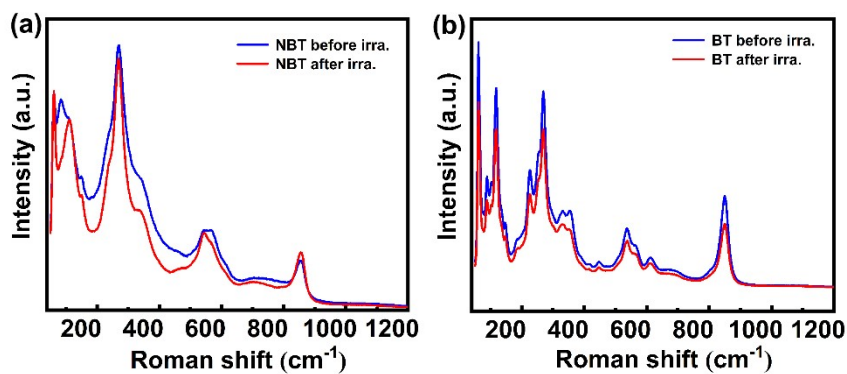

Fig. S5. Raman spectra of (a) NBT and (b) BT samples before and after 405 nm irradiation for 30 s, respectively.

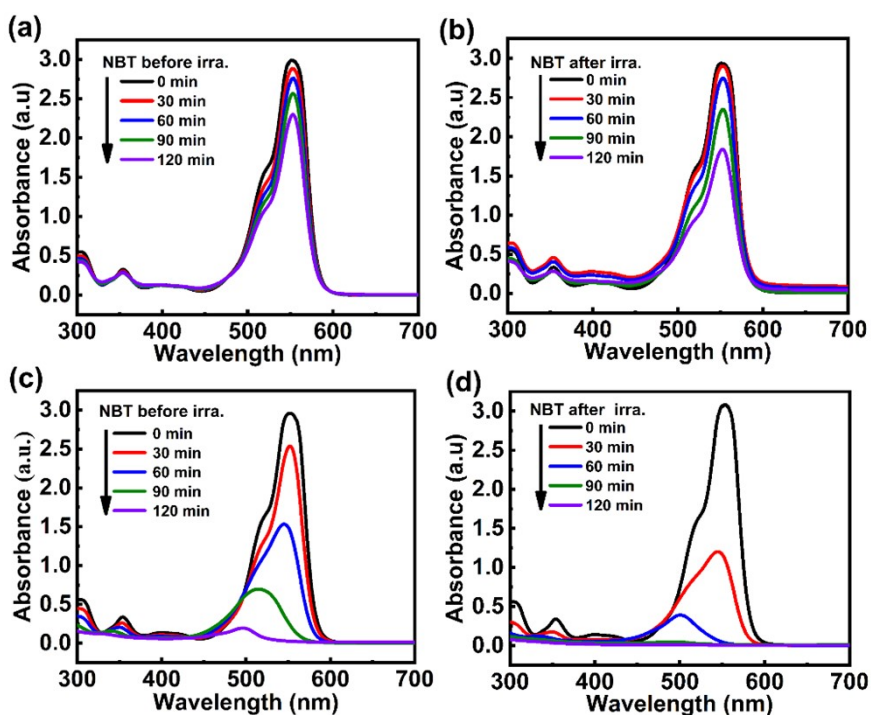

Fig. S6. (a) and (b) UV-absorption spectra of RhB for NBT sample before and after light irradiation in the piezocatalytic process, respectively; (c) and (d) UV-absorption spectra of RhB before and after light irradiation in the photocatalytic process, respectively.

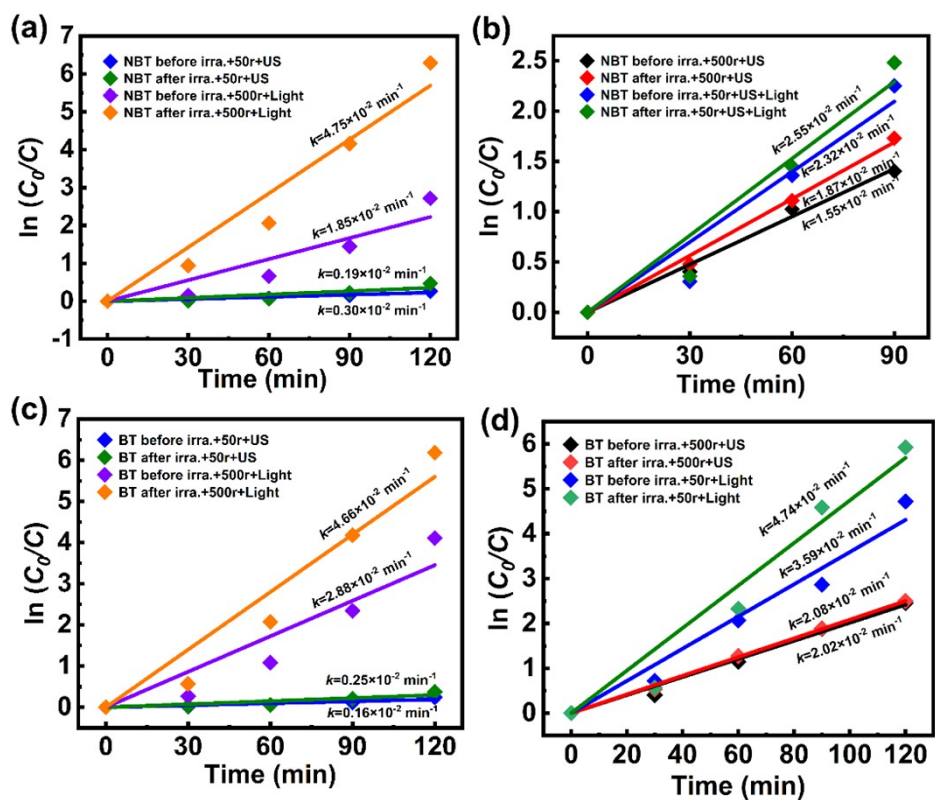

Fig. S7. (a) and (b) Pseudo-first-order kinetic linear fitting of RhB degradation of NBT before and after irradiation, respectively. (c) and (d) Pseudo-first-order kinetic linear fitting of RhB degradation of BT before and after irradiation, respectively.

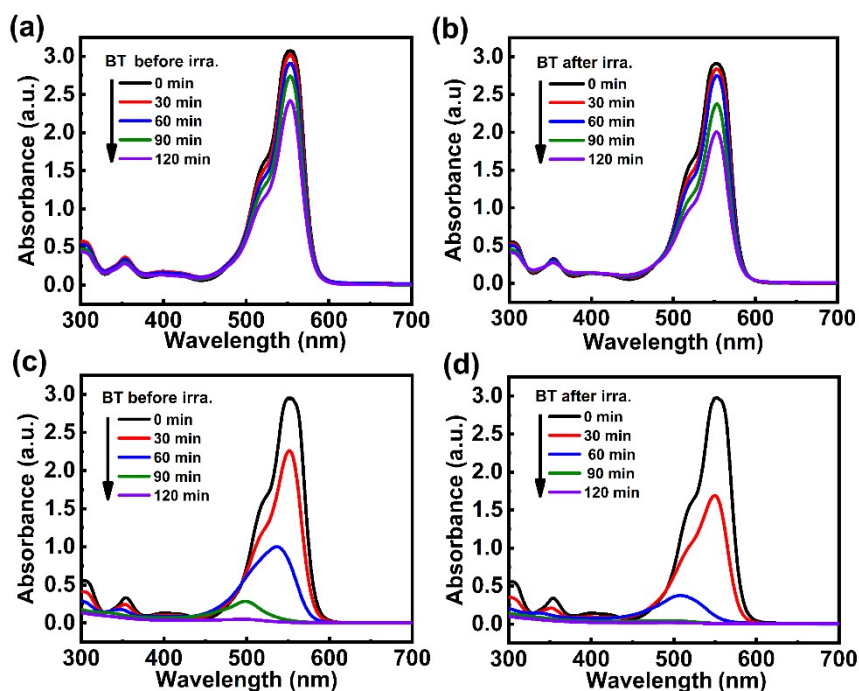

Fig. S8. (a) and (b) UV-absorption spectra of RhB for BT sample before and after light irradiation in the piezocatalytic process, respectively; (c) and (d) UV-absorption spectra of RhB before and after light irradiation in the photocatalytic process, respectively.

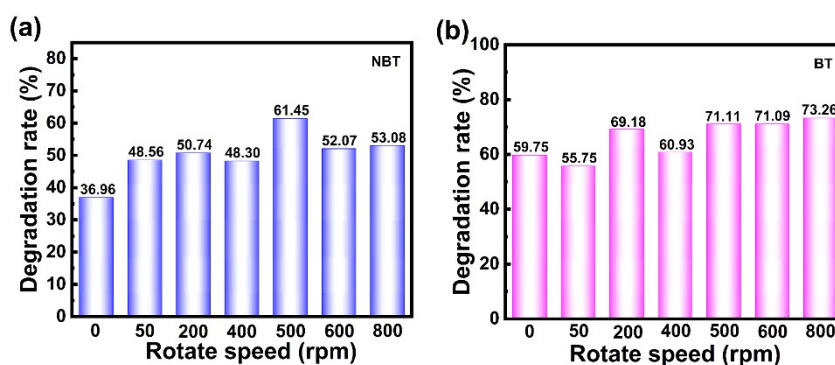

Fig. S9. The photocatalytic degradation rate of RhB at different mechanical stirring speeds for NBT (a) and BT (b) samples, respectively.

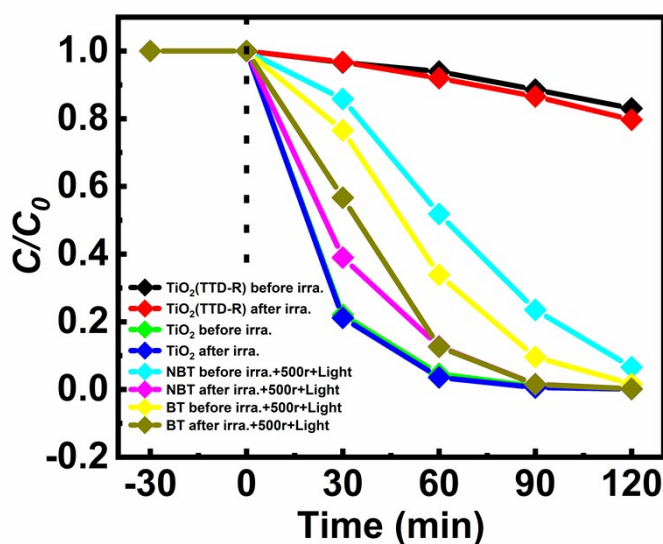

Fig. S10. The comparison of the catalytic degradation performance of TTD-R, TiO<sub>2</sub>, NBT and BT sample before and after light irradiation.

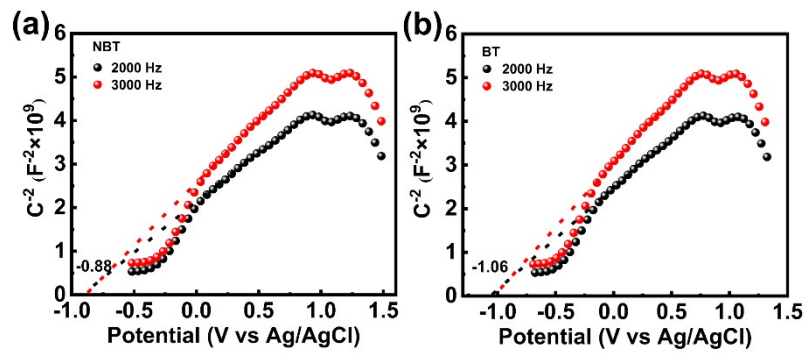

Fig. S11. Mott-Schottky plots of NBT (a) and BT (b) samples, respectively.
